# Supplementary material
Source: publisher figshare collection journal article supplement (https://gsajournals.figshare.com/ndownloader/files/21211560)
Supplement: Supplementary file 1 [file 21211560]

## Sheet: Sheet1
Sample name	Sample type	Correlation value
Diapause_1_2wk	Diapause	0.853755
Embryo_0_2hr	Embryo	0.847631
Embryo_2_4hr	Embryo	0.818362
Embryo_12_16hr	Embryo	0.893621
Embryo_16_20hr	Embryo	0.864355
Embryo_20_24hr	Embryo	0.874741
Embryo_24_28hr	Embryo	0.855887
Embryo_28_32hr	Embryo	0.870135
Embryo_32_36hr	Embryo	0.891121
Embryo_36_40hr	Embryo	0.892897
Embryo_4_8hr	Embryo	0.795467
Embryo_40_44hr	Embryo	0.832091
Embryo_44_48hr	Embryo	0.897258
Embryo_48_52hr	Embryo	0.651354
Embryo_52_56hr	Embryo	0.815134
Embryo_56_60hr	Embryo	0.853017
Embryo_60_64gr	Embryo	0.830126
Embryo_64_68hr	Embryo	0.653801
Embryo_68_72hr	Embryo	0.741315
Embryo_8_12hr	Embryo	0.845341
1st_instar_larvae	Larvae	0.875557
2nd_instar_larvae	Larvae	0.917762
3rd_instar_larvae	Larvae	0.819027
4th_instar_larvae	Larvae	0.365557
Male_carcass	Carcass	0.296797
Male_testes	Testes	0.0487336
NBF_carcass	Carcass	0.664196
NBF_ovaries	Ovary	0.471006
PBM_carcass_12hr	Carcass	0.795449
PBM_carcass_24hr	Carcass	0.745985
PBM_carcass_36hr	Carcass	0.552413
PBM_carcass_48hr	Carcass	0.634448
PBM_carcass_60hr	Carcass	0.698363
PBM_carcass_72hr	Carcass	0.789829
PBM_ovaries_12hr	Ovary	0.864257
PBM_ovaries_24hr	Ovary	0.982156
PBM_ovaries_36hr	Ovary	0.944499
PBM_ovaries_48hr	Ovary	0.852864
PBM_ovaries_60hr	Ovary	0.754939
PBM_ovaries_72hr	Ovary	0.862101
Pupae_female_early	Pupae	0.369378
Pupae_male_early	Pupae	0.59985
